# Supplementary material for: Temperature, Salinity and Garlic Additive Shape the Microbial Community during Traditional Beetroot Fermentation Process
Source: MDPI journal article supplement (doi:10.3390/foods12163079), 2023-08-16
Supplement: s1 [file s1]

# Supplementary table

Table S1. The number of reads of potential human pathogens obtained by the sequencing at the species level

| Species                                                        | R   | S0  | S5  | S40 | T15 | TM  | G10 | G20 | G30 |
|----------------------------------------------------------------|-----|-----|-----|-----|-----|-----|-----|-----|-----|
| <i>Salmonella sp. DAP8</i>                                     | n/d | n/d | 3   | n/d | n/d | 2   | 2   | n/d | n/d |
| <i>Uncultured Salmonella sp</i>                                | n/d | n/d | n/d | n/d | n/d | n/d | 50  | n/d | 2   |
| <i>Salmonella enterica subsp. enterica serovar Typhi</i>       | n/d | n/d | n/d | n/d | n/d | n/d | 9   | n/d | 2   |
| <i>Salmonella enterica subsp. enterica serovar Typhimurium</i> | n/d |
| <i>Salmonella enterica subsp. houtenae str. ATCC BAA-1581</i>  | n/d | 2   | 3   |
| <i>Salmonella sp. Co9936</i>                                   | n/d | n/d | n/d | 2   | n/d | n/d | n/d | 2   | n/d |
| <i>Salmonella enterica</i>                                     | n/d | n/d | n/d | n/d | n/d | n/d | 10  | n/d | n/d |
| <i>Escherichia coli</i>                                        | 21  | 11  | 21  | 14  | 11  | 14  | n/d | 8   | 8   |
| <i>Escherichia sp. 4B</i>                                      | n/d | n/d | n/d | 2   | n/d | n/d | 2   | n/d | n/d |
| <i>Uncultured Escherichia sp</i>                               | n/d | 2   |
| <i>Uncultured Shigella sp</i>                                  | n/d | n/d | n/d | n/d | n/d | n/d | 2   | n/d | 2   |
| <i>Staphylococcus aureus</i>                                   | 4   | 2   | 5   | 6   | 4   | 2   | n/d | 4   | 1   |
| <i>Listeria monocytogenes</i>                                  | 2   | n/d | n/d | 2   | n/d | 2   | n/d | n/d | n/d |
| <i>Bacillus cereus</i>                                         | n/d | 3   | n/d |
