# Supplementary figures and images for: Temperature, Salinity and Garlic Additive Shape the Microbial Community during Traditional Beetroot Fermentation Process
Source: MDPI journal article supplement (doi:10.3390/foods12163079), 2023-08-16

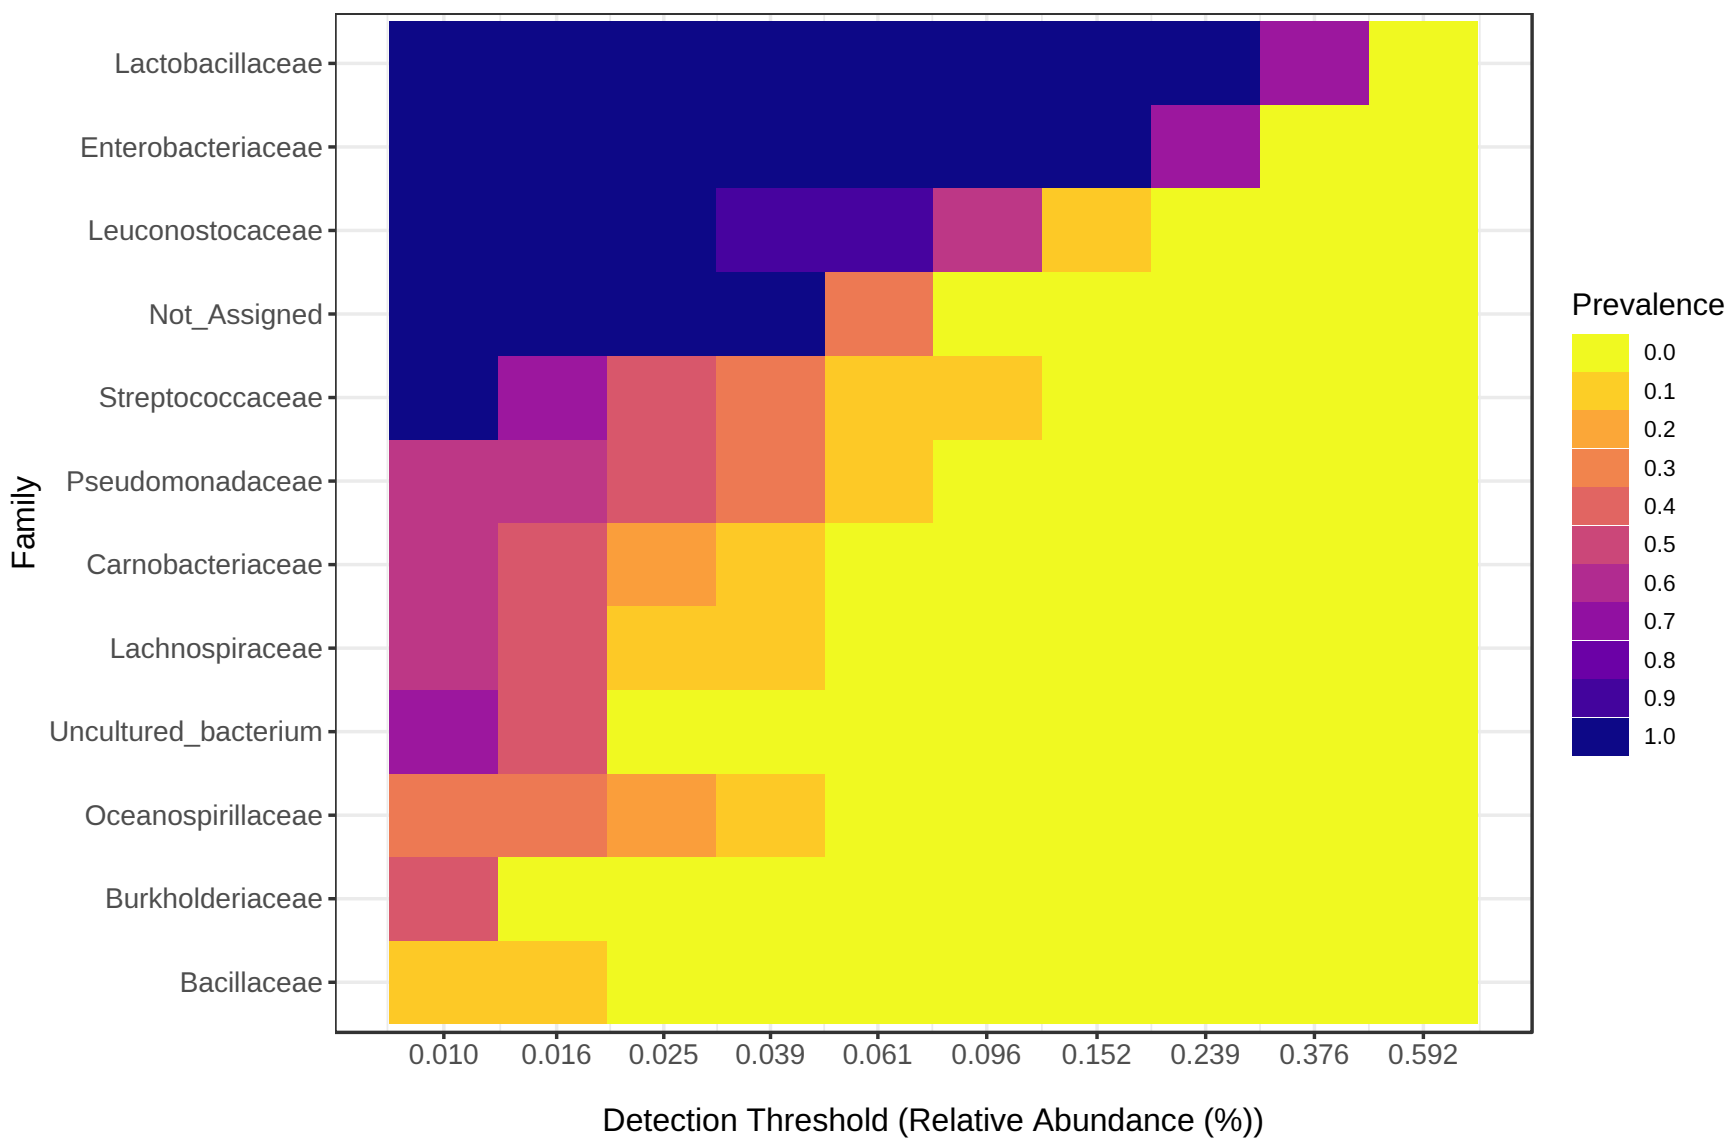

Supplement: s1 [file s1]

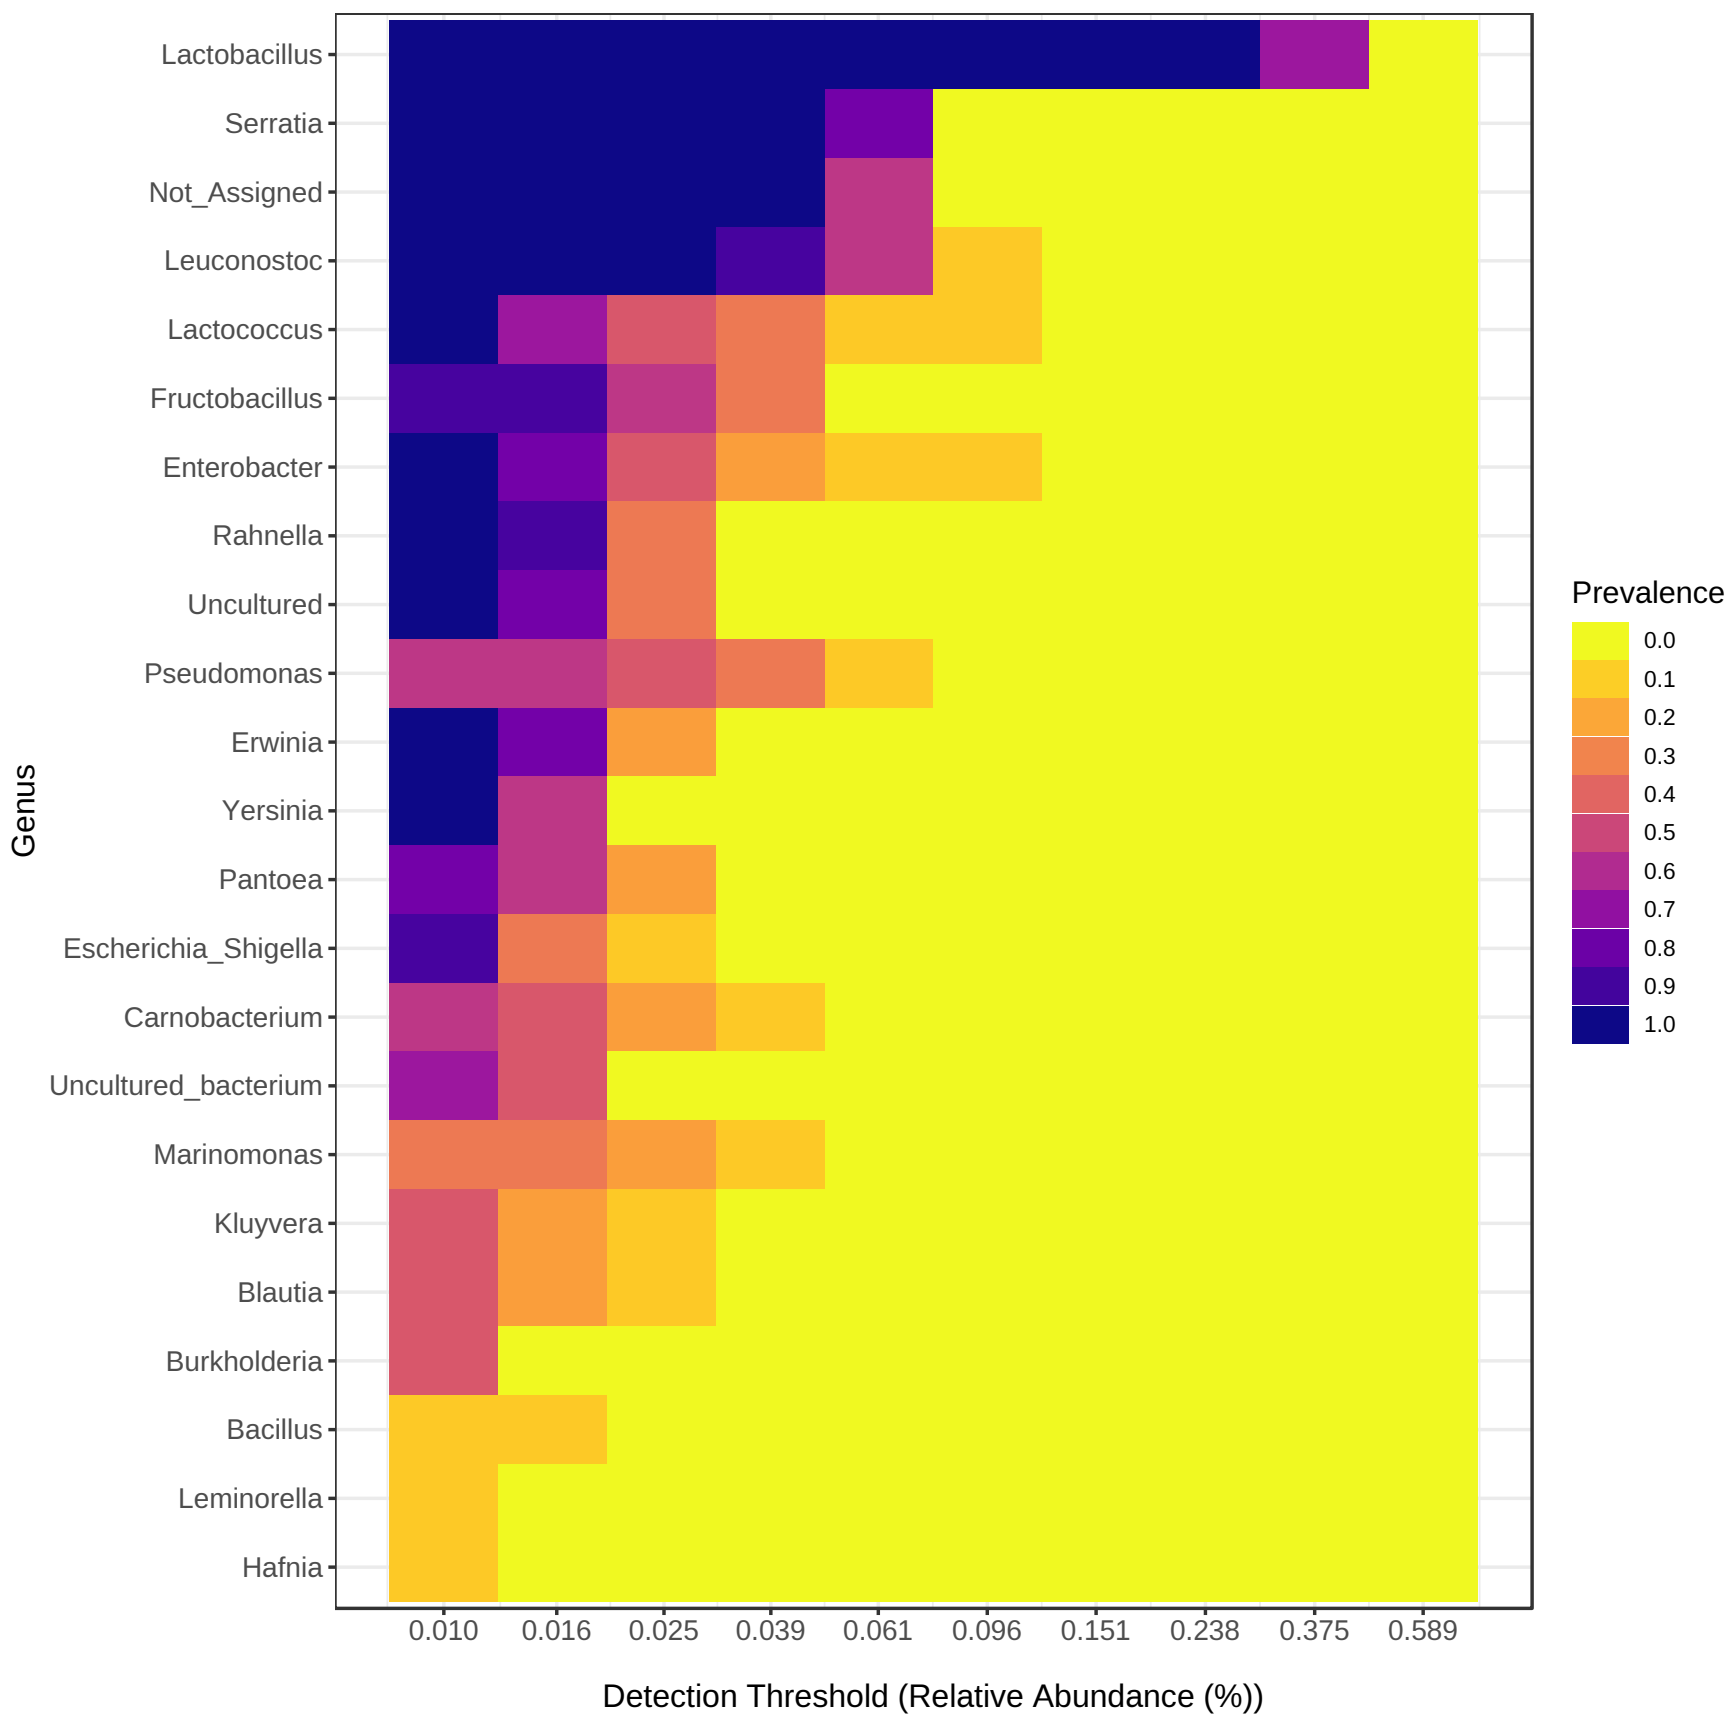

Supplement: s1 [file s1]

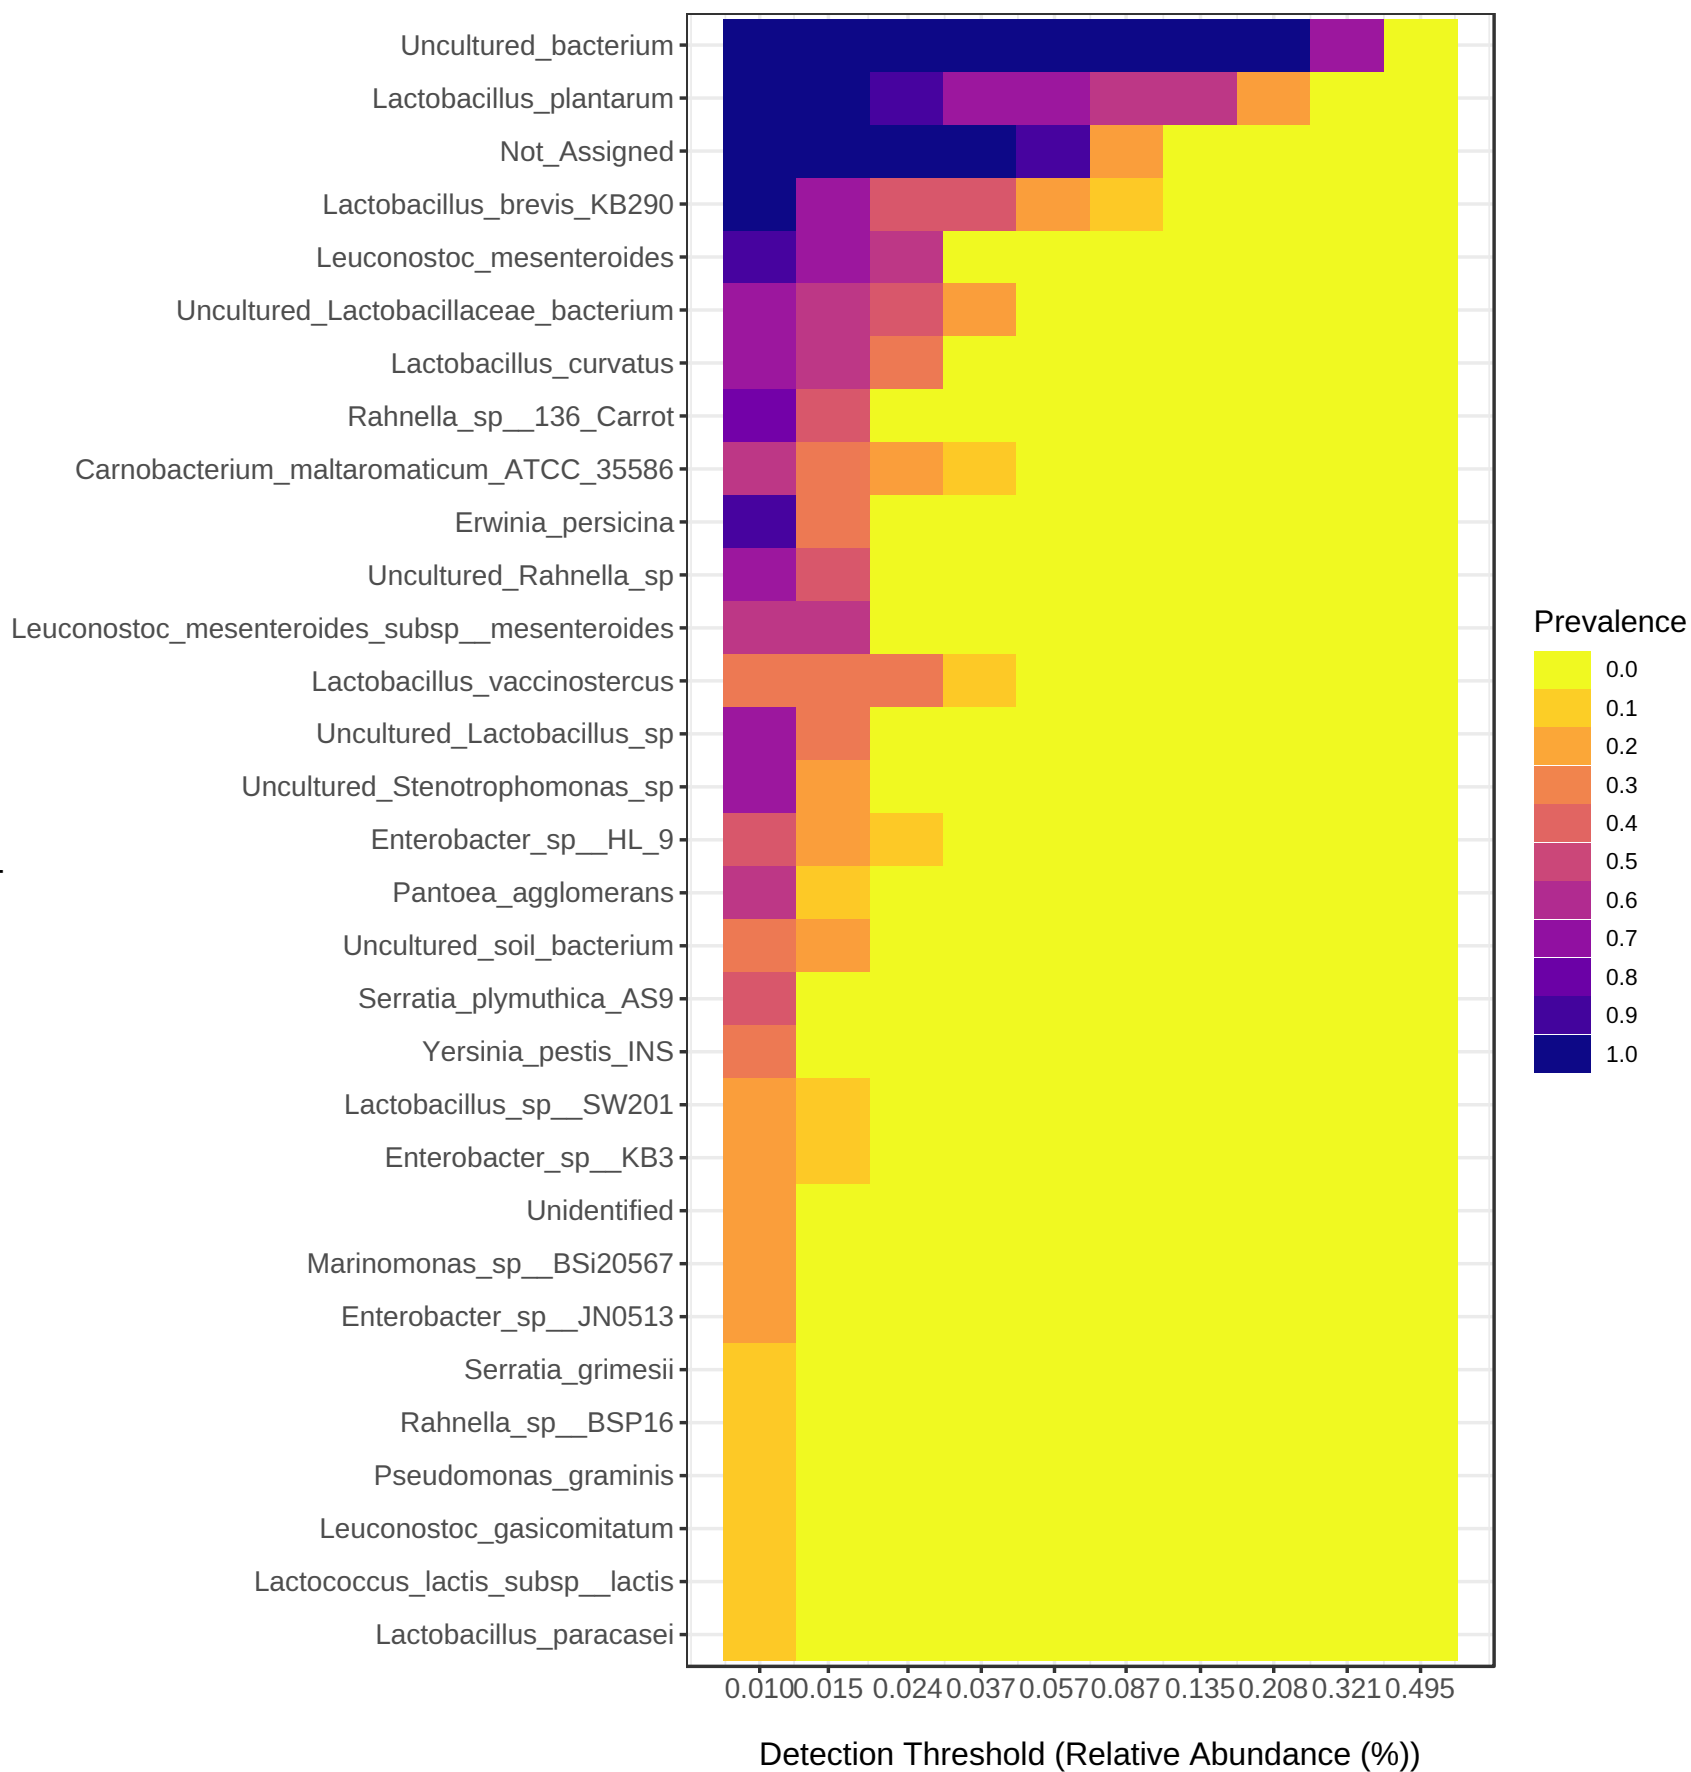

Supplement: s1 [file s1]
